# Supplementary material for: Hydrothermal topotactic epitaxy of SrTiO3 on Bi4Ti3O12 nanoplatelets: understanding the interplay of lattice mismatch and supersaturation
Source: Nanoscale Adv. 2023 May 8;5(11):3005–17. doi: 10.1039/d2na00741j (PMC10228367; doi:10.1039/d2na00741j)
Supplement: NA-005-D2NA00741J-s001 [file NA-005-D2NA00741J-s001.pdf]

## Electronic Supplementary Information

### Hydrothermal topotactic epitaxy of $\text{SrTiO}_3$ on $\text{Bi}_4\text{Ti}_3\text{O}_{12}$ nanoplatelets: understanding the interplay of lattice mismatch and supersaturation

Alja Čontala, Nina Daneu, Suraj Gupta, Matjaž Spreitzer, Anton Meden and Marjeta Maček Kržmanc\*

**Table S1:** Final concentrations (c) of reagents before hydrothermal reaction at 200 °C

| $\text{C}_{\text{Bi}_4\text{Ti}_3\text{O}_{12}}$ (mol/l) | Initial Sr/Ti ratio | $\text{C}_{\text{SrCl}_2 \times 6\text{H}_2\text{O}}$ (mol/L) | $\text{C}_{\text{NaOH}}$ (mol/L) |
|----------------------------------------------------------|---------------------|---------------------------------------------------------------|----------------------------------|
| 0.00102                                                  | 1:1                 | 0.00306                                                       | 2 and 6                          |
|                                                          | 3:1                 | 0.00918                                                       |                                  |
|                                                          | 12:1                | 0.03672                                                       |                                  |
|                                                          | 24:1                | 0.07344                                                       |                                  |

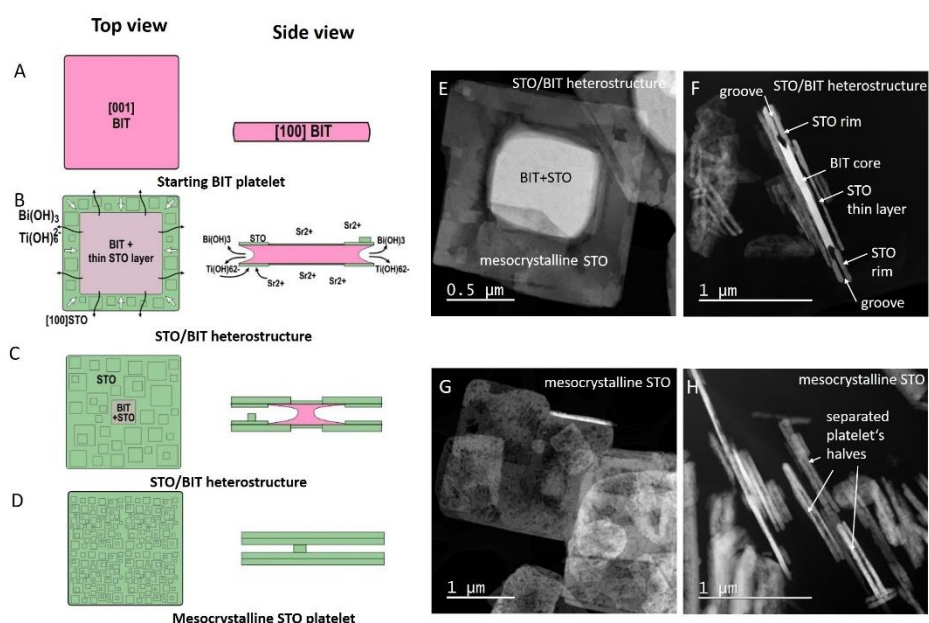

**Figure S1:** (A-D) schematic presentation of the  $\text{Bi}_4\text{Ti}_3\text{O}_{12}$ -to- $\text{SrTiO}_3$  transformation from the top and side view: (A)  $\Rightarrow$  initial  $\text{Bi}_4\text{Ti}_3\text{O}_{12}$  (BIT) platelets, (B, C)  $\Rightarrow$   $\text{SrTiO}_3/\text{Bi}_4\text{Ti}_3\text{O}_{12}$  (STO/BIT) heterostructural platelets at different stages of the transformation, (D)  $\text{SrTiO}_3$  (STO) platelets. (E-H) STEM micrographs of the (E, F) heterostructural  $\text{SrTiO}_3/\text{Bi}_4\text{Ti}_3\text{O}_{12}$  (STO/BIT) platelets and (G, H)  $\text{SrTiO}_3$  platelets from the top (E, G) and side view (F, H). The STEM micrographs, shown in E and F, and those presented in G and H, correspond to the to the transformation schematically presented at B and D, respectively.<sup>1</sup>

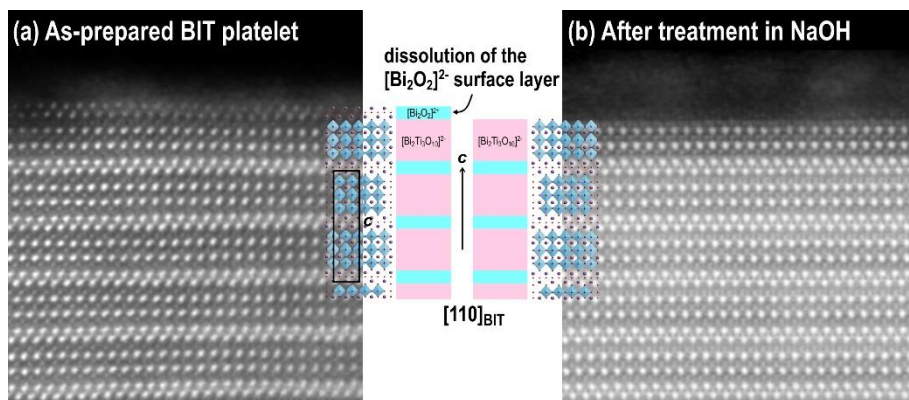

**Figure S2:** Cross-sectional HAADF-HR-STEM images of the  $\text{Bi}_4\text{Ti}_3\text{O}_{12}$  (BIT) platelet in the  $[110]$  orientation taken near the surface of the platelets with overlaid structural models: (a) As-prepared  $\text{Bi}_4\text{Ti}_3\text{O}_{12}$  (BIT) platelets, terminated by bismuth oxide  $[\text{Bi}_2\text{O}_2]^{2-}$  layer (the black rectangular denotes the unit cell of  $\text{Bi}_4\text{Ti}_3\text{O}_{12}$ ) and (b)  $\text{Bi}_4\text{Ti}_3\text{O}_{12}$  (BIT) platelets after exposure to hot NaOH (6 mol/L NaOH, holding time 1 hour at 200 °C), terminated by pseudoperovskite  $[\text{Bi}_2\text{Ti}_3\text{O}_{10}]^{2-}$  blocks.

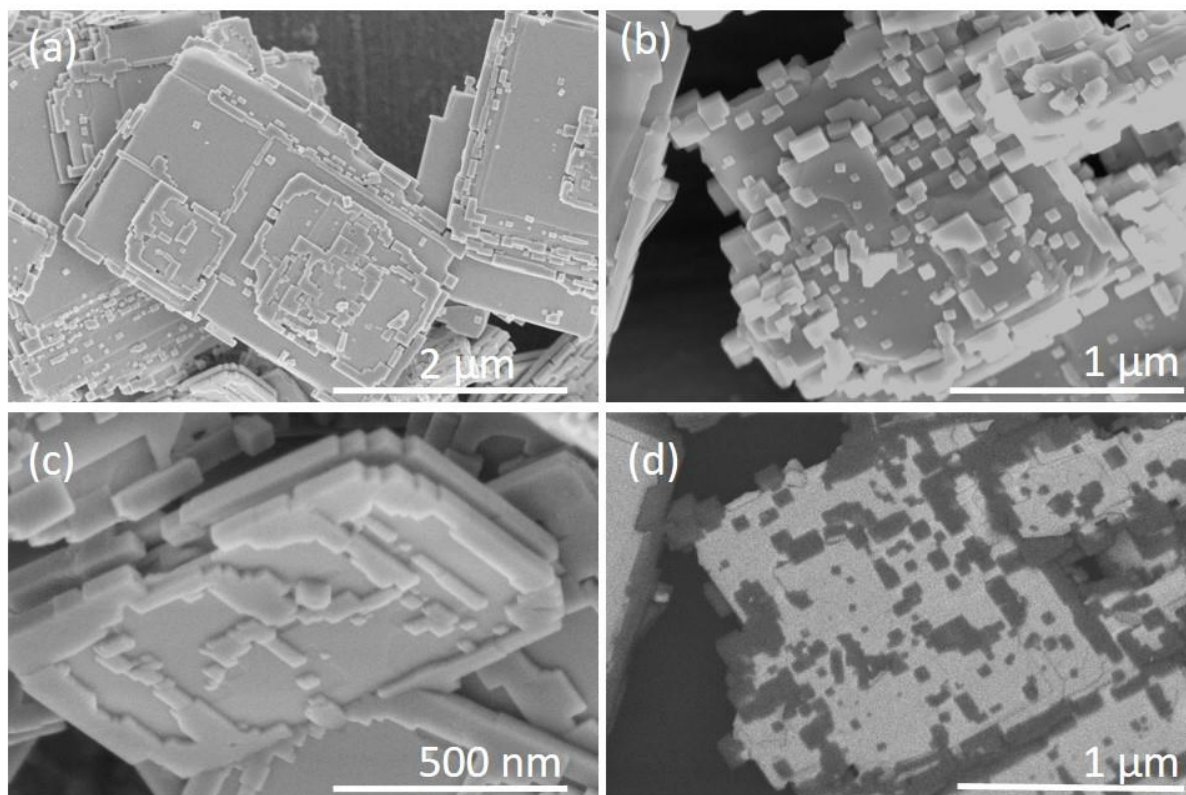

**Figure S3:** SEM micrographs (a-c secondary electron (SE) images) of the  $\text{SrTiO}_3/\text{Bi}_4\text{Ti}_3\text{O}_{12}$  platelets after 2.5 h at 200 °C at  $\text{Sr}/\text{Ti}=1$  in 2 mol/l NaOH. Image (d) is backscattered (BSE) image of the image shown in (b).

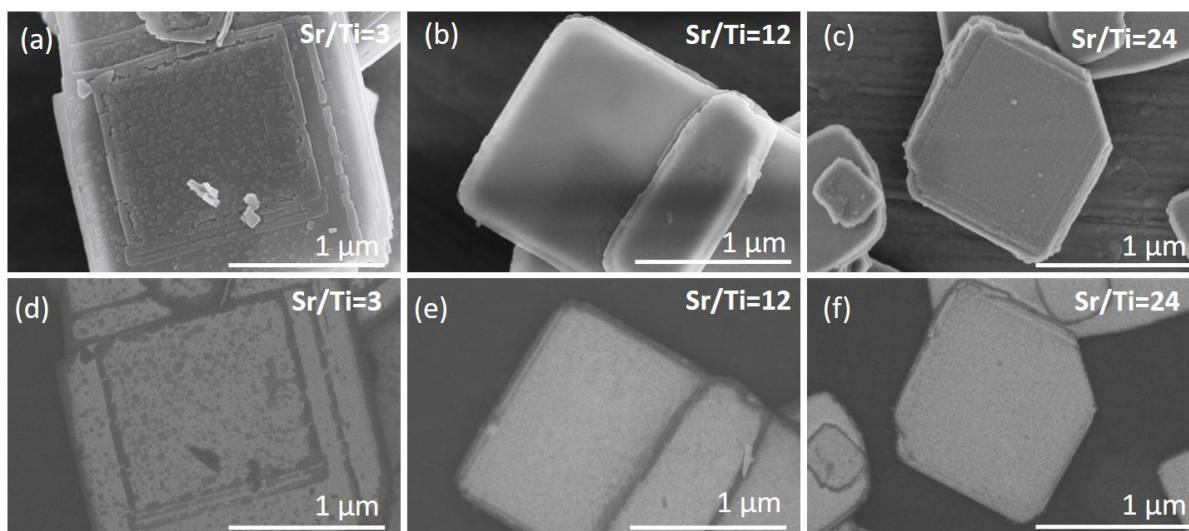

**Figure S4:** SEM micrographs (SE images: **a,b,c** and BSE images: **d,e,f**) of the  $\text{SrTiO}_3/\text{Bi}_4\text{Ti}_3\text{O}_{12}$  platelets after 2.5 h at 200 °C in 2 mol/l NaOH at various Sr/Ti ratios: (**a, d**) Sr/Ti=3, (**b, e**) Sr/Ti=12, (**c, f**) Sr/Ti=24.

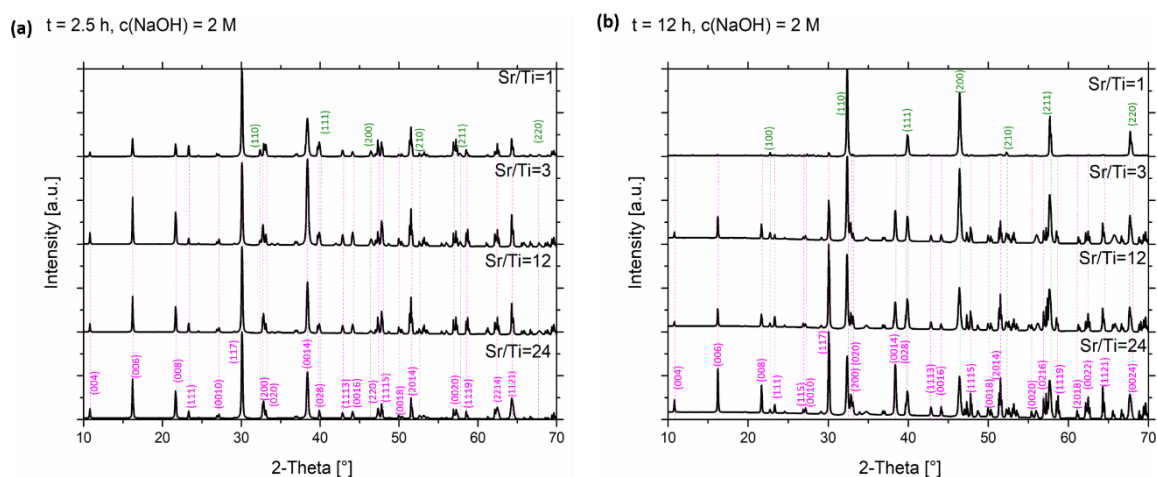

**Figure S5:** Powder XRD patterns ( $2\theta$ : 10 °-70 °) of  $\text{SrTiO}_3/\text{Bi}_4\text{Ti}_3\text{O}_{12}$  and  $\text{SrTiO}_3$  reaction product after 2.5 h and 12 h at 200 °C in 2 mol/L NaOH at different Sr/Ti ratios. The XRD patterns were indexed with JCPDS reference cards 01-074-1296 and 01-072-1019 for  $\text{SrTiO}_3$  (STO) and  $\text{Bi}_4\text{Ti}_3\text{O}_{12}$  (BIT), respectively.

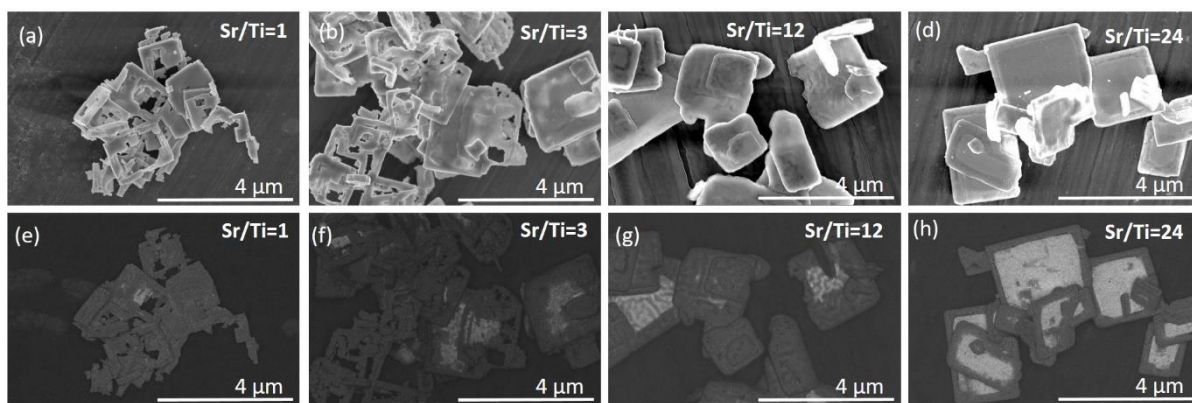

**Figure S6:** SEM micrographs of the  $\text{SrTiO}_3$  structures and  $\text{SrTiO}_3/\text{Bi}_4\text{Ti}_3\text{O}_{12}$  platelet after 12 h reaction at 200 °C in 2 mol/L NaOH and at different Sr/Ti ratios (a-d: SE images, e-h: corresponding BSE images).

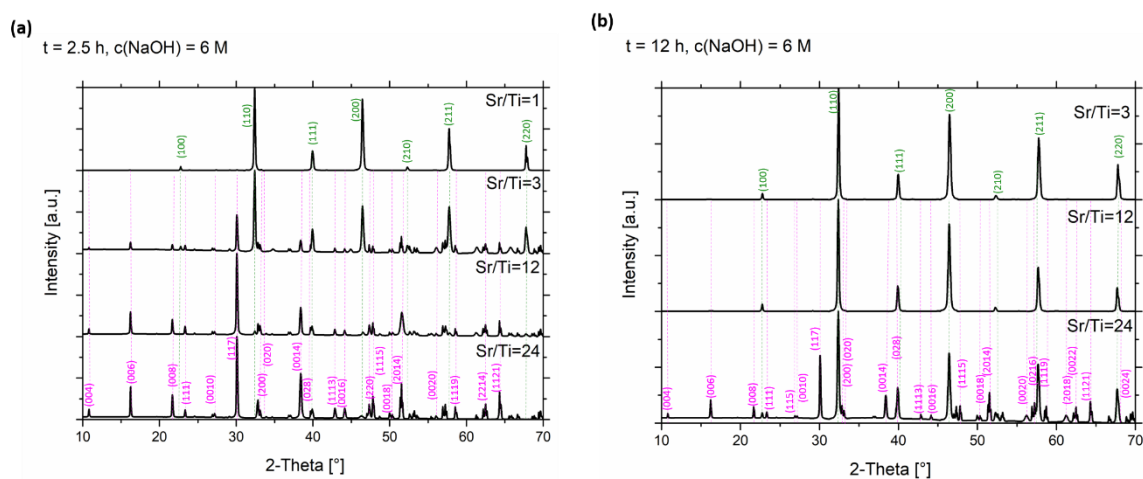

**Figure S7:** Powder XRD patterns ( $2\theta$ : 10 °-70 °) of  $\text{SrTiO}_3/\text{Bi}_4\text{Ti}_3\text{O}_{12}$  and  $\text{SrTiO}_3$  reaction product after 2.5 h and 12 h at 200 °C in 6 mol/L NaOH at different Sr/Ti ratios. The XRD patterns were indexed with JCPDS reference cards 01-074-1296 and 01-072-1019 for  $\text{SrTiO}_3$  (STO) and  $\text{Bi}_4\text{Ti}_3\text{O}_{12}$  (BIT), respectively.

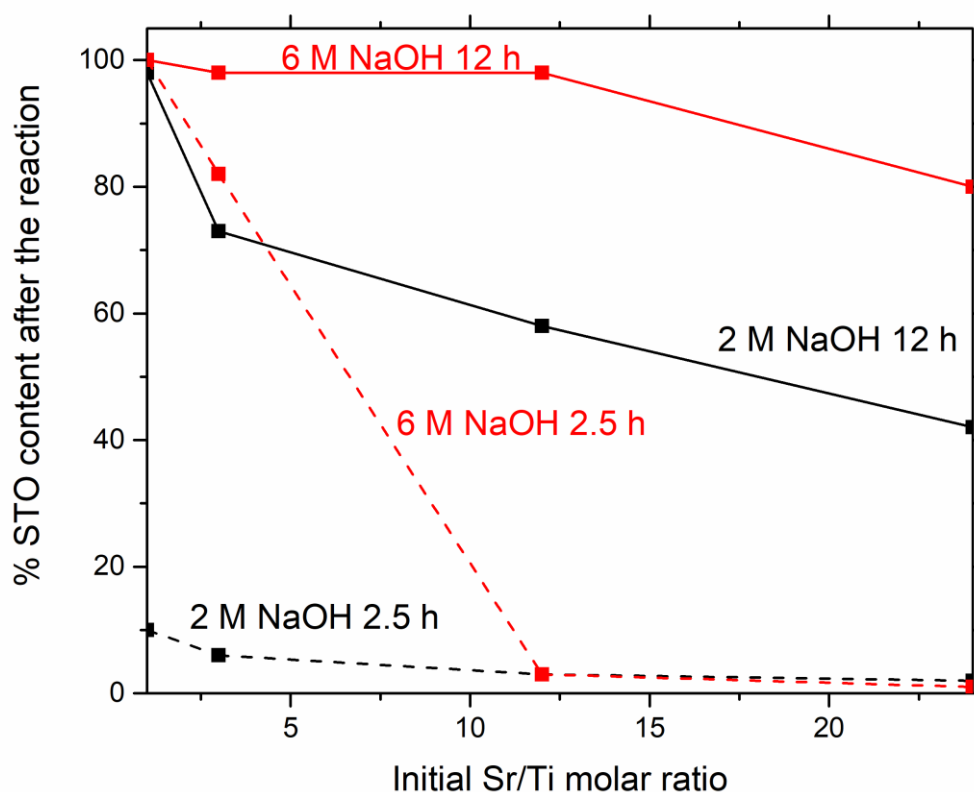

**Figure S8:** Graphical presentation of the SrTiO<sub>3</sub> (STO) content in percentage after the reaction. The lines are added for visualisation; however, the reactions were performed only for Sr/Ti=1, 3, 12 and 24 molar ratios (the points denoted with squares). The black lines are for the reactions in 2 mol/L NaOH and the red lines are for the reactions in 6 mol/L NaOH. In both cases, dashed lines are for the reactions after 2.5 h and solid for the reactions after 12 h. All reactions were performed at 200 °C.

## References

- (1) Maček Kržmanc, M.; Daneu, N.; Čontala, A.; Santra, S.; Kamal, K. M.; Likozar, B.; Spreitzer, M. SrTiO<sub>3</sub>/Bi<sub>4</sub>Ti<sub>3</sub>O<sub>12</sub> Nanoheterostructural Platelets Synthesized by Topotactic Epitaxy as Effective Noble-Metal-Free Photocatalysts for PH-Neutral Hydrogen Evolution. *ACS Appl. Mater. Interfaces* **2021**, 13 (1), 370–381. <https://doi.org/10.1021/acsami.0c16253>.
